# Supplementary material
Source: publisher figshare collection journal article supplement (https://karger.figshare.com/ndownloader/files/8834080)

**Supplemental Material**

**Figure legends:**

**Supplement table I:**  Annual combined incidence of neurological events (IS/TIA and CRV) and PSCS among sub-groups divided on the basis of risk factor control. IS = ischemic stroke, LDL = low density lipoprotein, SBP= systolic blood pressure DBP = diastolic blood pressure and PSCS = progression of carotid artery

**Supplement table II**: Summarizes the results of the three separate univariate logistic regression models for (PSCS, IS/TIA and IS/TIA and CRV) various risk factors including baseline demographic, clinical, and biochemical risk factors. The results are expressed as unadjusted hazard ratios (HR).

**Supplemental Tables:**


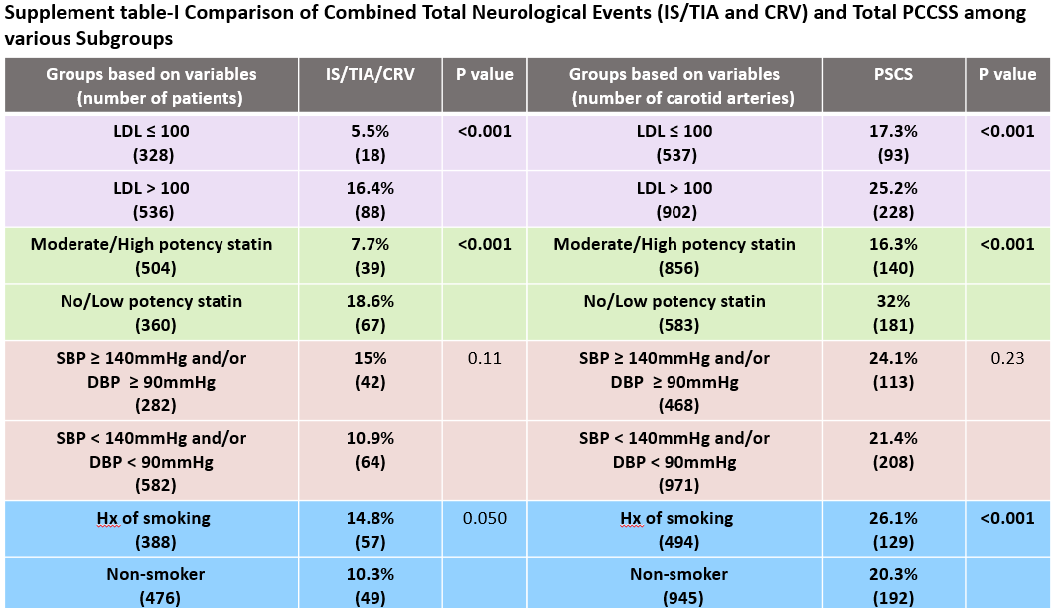


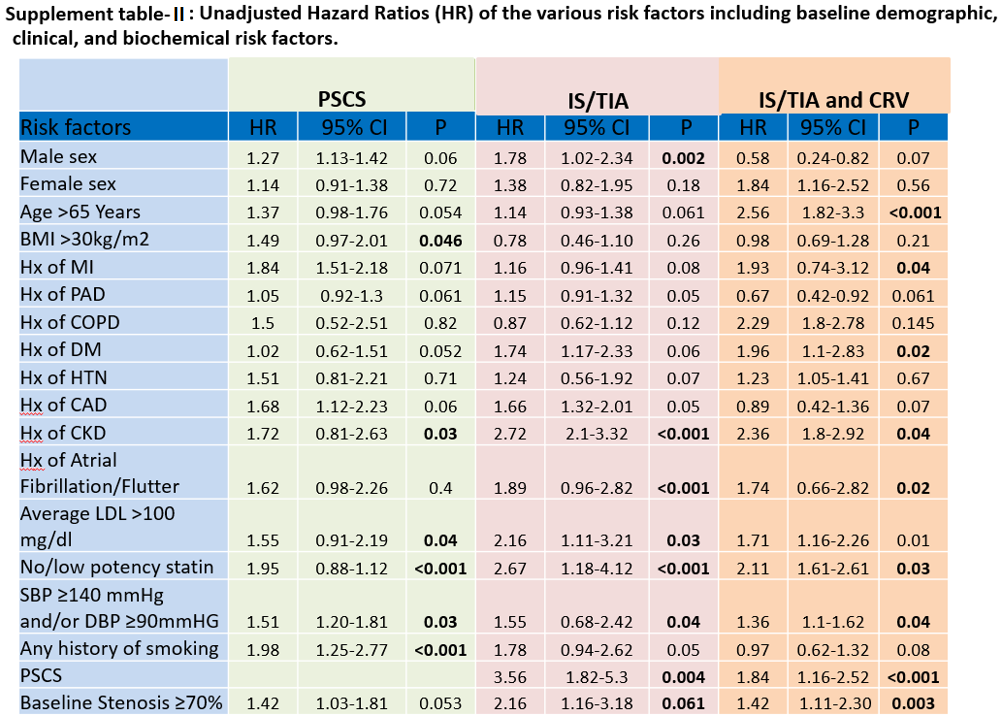

Supplement: Supplementary file 1 [file 8834080]
